# Supplementary material for: Entwicklung der Zahn- und Mundgesundheit in Deutschland von 1997 bis 2014
Source: Springer Nature journal article supplement (doi:10.1007/s00103-021-03345-6), 2021-06-18
Supplement: MOESM1 [file 19273034]

Elektronisches Zusatzmaterial zum Beitrag:

## Entwicklung der Zahn- und Mundgesundheit in Deutschland von 1997 bis 2014

Thomas Kocher<sup>1</sup>, Birte Holtfreter<sup>1</sup>, Vinay Pitchika<sup>1</sup>, Kathrin Kuhr<sup>2</sup>, Rainer A. Jordan<sup>2</sup>

<sup>1</sup> Poliklinik für Zahnerhaltung, Parodontologie, Endodontologie, Kinderzahnheilkunde und Präventive Zahnheilkunde, Universitätsmedizin Greifswald, Greifswald, Deutschland

<sup>2</sup> Institut der Deutschen Zahnärzte (IDZ), Köln, Deutschland

### Korrespondenzadresse

Prof. Dr. Thomas Kocher

Poliklinik für Zahnerhaltung, Parodontologie, Endodontologie, Kinderzahnheilkunde und Präventive Zahnheilkunde, Universitätsmedizin Greifswald

Fleischmannstraße 42

17475 Greifswald

Deutschland

[kocher@uni-greifswald.de](mailto:kocher@uni-greifswald.de)

### Inhalt:

Ergänzung zur Methode: Erhebung des Parodontalstatus

**Tabelle Z1:** Verteilung des DMF-T und seiner Einzelkomponenten in den Deutschen Mundgesundheitsstudien (DMS) und der Study of Health in Pomerania (SHIP).

**Tabelle Z2:** Verteilung des Community Periodontal Indexes (CPI) unter Berücksichtigung der Zahnlosigkeit in den Deutschen Mundgesundheitsstudien (DMS) und der Study of Health in Pomerania (SHIP).

## **Ergänzung zur Methode: Erhebung des Parodontalstatus**

Die parodontale Befundung erfolgte mit Hilfe einer manuellen Parodontalsonde (SHIP-0: PCP11; SHIP-Trend-0: PCP15; DMS: PCP 11.5B; Hu-Friedy, Tuttlingen, Deutschland). In SHIP wurde die Sondierungstiefe halbseitig (1./4. oder 2./3. Quadrant; in SHIP-0 alternierend, in SHIP-Trend-0 randomisiert ausgewählt) an vier Stellen pro Zahn (mesiobukkal, mittbukkal, distobukkal, mittoral) erfasst. In DMS III wurde die Sondierungstiefe halbseitig (1./4. Quadrant) an zwei Stellen (mesiobukkal und mittbukkal) erfasst, während in DMS IV und V jeweils drei Stellen (mesiobukkal, mittbukkal, distooral) aller 12 Indexzähne (17, 16, 11, 24, 26, 27, 37, 36, 31, 44, 46, 47) befundet wurden.

**Tabelle Z1:** Verteilung des DMF-T und seiner Einzelkomponenten in den Deutschen Mundgesundheitsstudien (DMS) und der Study of Health in Pomerania (SHIP) nach Altersgruppen. Angabe von Mittelwerten für die Anzahl der jeweils betroffenen Zähne.

|                          | N    | Anzahl gesunder Zähne (ST) | Anzahl gefüllter Zähne (FT) | Anzahl kariöser Zähne (DT) | Anzahl fehlender Zähne (MT) | Anzahl kariöser, gefüllter oder fehlender Zähne (DMFT) |
|--------------------------|------|----------------------------|-----------------------------|----------------------------|-----------------------------|--------------------------------------------------------|
| <b>DMS</b>               |      |                            |                             |                            |                             |                                                        |
| <i>35-44 Jahre</i>       |      |                            |                             |                            |                             |                                                        |
| 1997                     | 655  | 11,9                       | 11,7                        | 0,5                        | 3,9                         | 16,1                                                   |
| 2005                     | 925  | 13,4                       | 11,7                        | 0,5                        | 2,4                         | 14,5                                                   |
| 2014                     | 966  | 16,8                       | 8,6                         | 0,5                        | 2,1                         | 11,2                                                   |
| <i>65-74 Jahre</i>       |      |                            |                             |                            |                             |                                                        |
| 1997                     | 1367 | 4,3                        | 5,8                         | 0,3                        | 17,6                        | 23,6                                                   |
| 2005                     | 1040 | 5,9                        | 7,7                         | 0,3                        | 14,1                        | 22,1                                                   |
| 2014                     | 1042 | 10,3                       | 6,1                         | 0,5                        | 11,1                        | 17,7                                                   |
| <b>SHIP (halbseitig)</b> |      |                            |                             |                            |                             |                                                        |
| <i>25-34 Jahre</i>       |      |                            |                             |                            |                             |                                                        |
| 1997-2001                | 698  | 6,6                        | 5,8                         | 0,4                        | 1,2                         | 7,4                                                    |
| 2008-2012                | 534  | 8,5                        | 4,8                         | 0,3                        | 0,4                         | 5,5                                                    |
| <i>35-44 Jahre</i>       |      |                            |                             |                            |                             |                                                        |
| 1997-2001                | 755  | 5,3                        | 5,6                         | 0,3                        | 2,8                         | 8,7                                                    |
| 2008-2012                | 714  | 6,2                        | 6,3                         | 0,2                        | 1,3                         | 7,8                                                    |
| <i>45-54 Jahre</i>       |      |                            |                             |                            |                             |                                                        |
| 1997-2001                | 744  | 4,7                        | 5,1                         | 0,2                        | 4,0                         | 9,3                                                    |
| 2008-2012                | 833  | 4,8                        | 5,9                         | 0,2                        | 3,1                         | 9,2                                                    |
| <i>55-64 Jahre</i>       |      |                            |                             |                            |                             |                                                        |
| 1997-2001                | 842  | 3,5                        | 3,7                         | 0,2                        | 6,6                         | 10,5                                                   |
| 2008-2012                | 826  | 3,6                        | 5,3                         | 0,1                        | 5,0                         | 10,4                                                   |
| <i>65-74 Jahre</i>       |      |                            |                             |                            |                             |                                                        |
| 1997-2001                | 681  | 1,9                        | 2,0                         | 0,2                        | 9,9                         | 12,1                                                   |
| 2008-2012                | 659  | 2,7                        | 4,0                         | 0,1                        | 7,2                         | 11,3                                                   |

Berechnung unter Berücksichtigung der zahnlosen Probanden. SHIP: Befunderhebung halbseitig (maximal 14 Zähne, 64 Flächen). Abkürzungen: N, Anzahl; DMFT, Decayed, Missing, Filled Teeth; DT, Decayed Teeth; FT, Filled Teeth; MT, Missing Teeth; ST, Sound Teeth.

**Tabelle Z2:** Verteilung des Community Periodontal Indexes (CPI) unter Berücksichtigung der Zahnlosigkeit in den Deutschen Mundgesundheitsstudien (DMS) und den Studies of Health in Pomerania (SHIP) nach Altersgruppen. Darstellung relativer Häufigkeiten für die einzelnen CPI Grade sowie Zahnlosigkeit.

|                                                         | N    | CPI-Grade 0-2 | CPI-Grad 3 | CPI-Grad 4 | Zahnlos |
|---------------------------------------------------------|------|---------------|------------|------------|---------|
| <b>DMS (Zähne 17, 16, 11, 44, 46 und 47; 2 Flächen)</b> |      |               |            |            |         |
| <i>35-44 Jahre</i>                                      |      |               |            |            |         |
| 1997                                                    | 648  | 55,8%         | 33,9%      | 9,3%       | 1,1%    |
| 2005                                                    | 920  | 57,0%         | 35,8%      | 6,3%       | 1,0%    |
| 2014                                                    | 884  | 61,1%         | 34,5%      | 3,5%       | 0,8%    |
| <i>65-74 Jahre</i>                                      |      |               |            |            |         |
| 1997                                                    | 1169 | 30,2%         | 30,2%      | 10,5%      | 29,1%   |
| 2005                                                    | 977  | 33,4%         | 30,9%      | 11,6%      | 24,1%   |
| 2014                                                    | 914  | 35,3%         | 40,6%      | 9,8%       | 14,2%   |
| <b>SHIP (halbseitig; 4 Flächen)</b>                     |      |               |            |            |         |
| <i>25-34 Jahre</i>                                      |      |               |            |            |         |
| 1997-2001                                               | 693  | 46,5%         | 43,4%      | 10,1%      | 0%      |
| 2008-2012                                               | 531  | 47,6%         | 47,0%      | 5,4%       | 0%      |
| <i>35-44 Jahre</i>                                      |      |               |            |            |         |
| 1997-2001                                               | 749  | 25,7%         | 48,4%      | 25,2%      | 0,7%    |
| 2008-2012                                               | 707  | 33,3%         | 47,3%      | 19,2%      | 0,3%    |
| <i>45-54 Jahre</i>                                      |      |               |            |            |         |
| 1997-2001                                               | 741  | 15,6%         | 45,2%      | 36,4%      | 2,8%    |
| 2008-2012                                               | 818  | 21,0%         | 49,0%      | 28,2%      | 1,8%    |
| <i>55-64 Jahre</i>                                      |      |               |            |            |         |
| 1997-2001                                               | 829  | 19,3%         | 36,6%      | 32,2%      | 11,9%   |
| 2008-2012                                               | 815  | 15,4%         | 46,2%      | 29,7%      | 8,8%    |
| <i>65-74 Jahre</i>                                      |      |               |            |            |         |
| 1997-2001                                               | 664  | 13,0%         | 31,3%      | 22,5%      | 33,2%   |
| 2008-2012                                               | 664  | 20,0%         | 39,2%      | 23,1%      | 17,8%   |

Abkürzungen: N, Anzahl
